# Supplementary material for: Nursing knowledge of and attitude in cardiopulmonary arrest: cross-sectional survey analysis
Source: PeerJ. 2019 Feb 7;7:e6410. doi: 10.7717/peerj.6410 (PMC6368968; doi:10.7717/peerj.6410)
Supplement: Supplemental Information 1 — Raw data measurements and codes archive. [file peerj-07-6410-s002.xlsx]

## Sheet: Hoja1
Gender	Work experience	Type of contract	Age	Service	Last recycling course	Last CPR	How often would it be necessary to take courses	Knowledge 1	Knowledge 2	Knowledge 3	Knowledge 4	Knowledge 5	Knowledge 6	Knowledge 7	Knowledge 8	Knowledge 9	Knowledge 10	Knowledge 11	Attitude 1	Attitude 2	Attitude 3	Attitude 4	Attitude 5	Attitude 6	Attitude 7	Attitude 8	Attitude 9	Attitude 10	Attitude 11	Attitude 12
Female	> 20 years	perMaleent contract	50	Pediatrics consultation Primary Care	>2 years	never	6m-1 year	3	2	1	4	1	1	1	1	1	1	3	1	1	3	3	5	4	4	2	3	3	4	3
Female	5-10 years	Eventual	28	Medical unit	never	<6 months	< 6 months	3	1	1	4	1	2	4	3	1	2	3	1	4	3	5	5	5	5	3	2	5	4	5
Female	> 20 years	perMaleent contract	42	Primary Care Consultation	>2 years	>2 years	1 -2 years	3	2	3	4	1	4	4	2	4	2	3	3	3	5	5	5	5	5	4	5	5	5	5
Female	16-20 years	perMaleent contract	47	Medical unit	>2 years	>2 years	< 6 months	3	2	1	4	1	4	2	2	1	2	3	1	1	5	5	5	5	5	5	5	5	5	5
Male	5-10 years	Eventual	30	Medical unit	>2 years	<6 months	6m-1 year	3	2	1	4	1	2	4	3	1	1	3	4	4	5	5	5	5	5	5	5	5	5	5
Female	11-15 years	perMaleent contract	32	Surgical unit	1 -2 years	6 m- 1year	< 6 months	3	1	1	4	1	4	4	2	1	1	3	2	2	5	5	5	5	3	2	3	4	5	4
Female	< 5 years	Eventual	22	Primary Care Consultation	6 m- 1year	never	1 -2 years	3	2	1	4	1	4	4	2	1	2	1	2	3	5	5	5	5	5	3	3	5	5	5
Female	> 20 years	perMaleent contract	49	Primary Care Consultation	6 m- 1year	>2 years	6m-1 year	1	2	1	4	1	3	4	2	1	2	3	3	2	4	5	5	5	5	5	3	5	5	5
Female	11-15 years	Eventual	38	Surgical unit	6 m- 1year	6 m- 1year	6m-1 year	3	1	1	4	1	4	4	2	1	1	3	4	2	3	5	5	5	5	2	1	4	5	5
Male	5-10 years	Eventual	42	Medical unit	1 -2 years	>2 years	1 -2 years	3	2	1	4	1	1	4	3	1	2	3	5	5	5	5	5	5	5	5	4	5	5	4
Female	11-15 years	perMaleent contract	39	Pediatric hospital service	1 -2 years	6 m- 1year	6m-1 year	3	1	1	4	1	2	1	2	1	1	3	4	3	4	4	3	4	5	3	2	4	5	3
Female	> 20 years	perMaleent contract	60	Surgical unit	never	<6 months	6m-1 year	3	2	1	4	1	2	4	2	1	1	3	5	5	5	5	5	5	5	3	5	3	5	5
Female	11-15 years	perMaleent contract	39	Surgical unit	1 -2 years	never	1 -2 years	1	2	1	4	1	2	4	3	1	2	3	3	3	5	5	5	5	5	4	4	2	5	5
Female	> 20 years	perMaleent contract	56	Primary Care Consultation	>2 years	>2 years	6m-1 year	3	2	2	2	1	1	4	1	1	2	3	4	4	4	4	4	5	5	3	2	4	5	4
Female	5-10 years	Eventual	34	Medical unit	1 -2 years	never	6m-1 year	3	2	1	4	1	1	1	1	1	1	3	3	4	4	5	5	5	5	3	3	3	5	5
Female	< 5 years	Eventual	25	Medical unit	never	1 -2 years	6m-1 year	3	2	1	4	1	1	4	2	1	1	3	3	4	5	5	5	5	5	3	4	4	5	5
Female	11-15 years	perMaleent contract	37	Medical unit	1 -2 years	6 m- 1year	6m-1 year	3	1	1	4	1	4	4	2	1	2	3	3	3	3	4	3	4	4	2	4	5	5	3
Female	11-15 years	Eventual	36	Medical unit	6 m- 1year	6 m- 1year	< 6 months	1	2	1	4	1	1	4	2	1	2	3	2	2	5	5	5	5	5	3	4	5	5	5
Female	11-15 years	perMaleent contract	39	Medical unit	>2 years	>2 years	6m-1 year	3	2	1	4	1	1	1	1	1	1	3	2	3	2	5	5	5	5	5	1	5	5	5
Female	> 20 years	perMaleent contract	49	Surgical unit	1 -2 years	>2 years	6m-1 year	3	3	1	3	1	4	1	2	1	3	3	1	1	2	5	5	5	5	3	5	1	5	5
Female	> 20 years	perMaleent contract	46	Medical unit	6 m- 1year	>2 years	< 6 months	3	1	1	4	1	3	4	3	2	1	3	3	4	5	5	5	5	5	5	4	4	5	5
Male	16-20 years	perMaleent contract	53	Medical unit	1 -2 years	<6 months	1 -2 years	3	2	1	4	1	4	1	1	1	2	3	3	4	3	4	4	4	4	4	4	4	4	3
Female	5-10 years	Eventual	31	Medical unit	<6 months	6 m- 1year	1 -2 years	3	2	1	3	1	4	1	2	1	2	2	1	1	3	5	5	5	5	5	5	4	5	3
Female	> 20 years	perMaleent contract	56	Surgical unit	>2 years	>2 years	6m-1 year	3	2	3	3	1	4	2	2	4	2	3	3	3	4	5	5	5	4	5	5	1	1	1
Male	16-20 years	Eventual	42	Medical unit	>2 years	>2 years	1 -2 years	1	1	4	4	1	2	4	1	1	1	3	3	3	4	3	5	4	5	3	4	4	5	5
Female	< 5 years	Eventual	22	Primary Care Consultation	1 -2 years	never	6m-1 year	3	2	1	4	1	1	4	3	1	2	3	4	3	5	4	5	5	1	5	3	4	5	4
Female	< 5 years	Eventual	27	Medical unit	>2 years	never	1 -2 years	3	1	3	4	3	1	2	2	1	3	1	1	2	5	5	3	5	4	4	4	3	1	4
Female	11-15 years	perMaleent contract	37	Medical unit	>2 years	1 -2 years	6m-1 year	3	2	1	4	1	4	4	2	1	2	3	4	4	3	5	3	5	5	3	4	2	5	4
Female	> 20 years	perMaleent contract	56	Primary Care Consultation	<6 months	>2 years	1 -2 years	3	1	1	4	1	2	4	2	1	2	3	4	4	3	5	5	5	5	1	5	5	5	4
Female	< 5 years	Eventual	25	Primary Care Consultation	1 -2 years	never	1 -2 years	3	2	3	4	1	1	4	2	1	3	3	3	3	5	5	2	5	4	1	1	1	4	1
Female	< 5 years	Eventual	22	Surgical unit	6 m- 1year	never	6m-1 year	3	2	1	4	1	1	4	2	1	2	3	3	2	4	5	4	5	5	3	5	3	5	5
Female	> 20 years	perMaleent contract	47	Medical unit	>2 years	>2 years	< 6 months	3	1	1	4	1	4	4	3	1	1	3	1	1	3	5	5	5	5	3	5	5	5	1
Female	< 5 years	Eventual	24	Primary Care Consultation	6 m- 1year	never	< 6 months	3	1	1	4	1	4	4	1	1	1	3	2	2	3	5	5	3	5	3	3	5	5	5
Female	11-15 years	Eventual	36	Surgical unit	>2 years	>2 years	6m-1 year	3	2	1	4	1	4	4	2	2	1	3	3	3	3	5	5	5	5	4	4	4	5	5
Female	> 20 years	perMaleent contract	48	Surgical unit	>2 years	>2 years	6m-1 year	3	1	1	4	1	4	4	1	1	1	3	4	4	4	4	4	4	3	3	3	3	4	2
Female	> 20 years	perMaleent contract	48	Medical unit	>2 years	<6 months	6m-1 year	2	1	2	4	1	4	4	2	1	1	3	2	2	4	5	5	4	4	3	3	3	3	1
Male	5-10 years	Eventual	33	Medical unit	>2 years	>2 years	1 -2 years	3	2	3	4	1	1	2	2	1	2	3	3	3	5	5	5	4	5	2	5	4	5	3
Female	11-15 years	Eventual	36	Primary Care Consultation	1 -2 years	never	6m-1 year	3	1	1	4	1	1	4	1	1	3	3	2	2	3	4	5	4	4	2	3	3	3	2
Female	5-10 years	Eventual	33	Surgical unit	>2 years	6 m- 1year	6m-1 year	3	2	1	4	1	1	4	2	2	2	3	2	3	3	5	5	4	5	3	3	4	5	5
Female	11-15 years	perMaleent contract	39	Medical unit	>2 years	>2 years	6m-1 year	3	1	3	4	1	1	4	1	2	1	3	2	3	3	5	5	4	5	3	5	3	5	4
Male	> 20 years	perMaleent contract	47	Primary Care Consultation	>2 years	never	1 -2 years	3	2	3	4	1	1	1	2	1	2	1	2	2	3	5	1	5	3	2	1	2	5	4
Female	> 20 years	perMaleent contract	52	Primary Care Consultation	1 -2 years	>2 years	1 -2 years	3	1	1	4	1	4	1	2	4	4	3	4	4	5	5	5	5	5	4	4	3	3	4
Female	< 5 years	Eventual	25	Medical unit	6 m- 1year	<6 months	< 6 months	3	2	1	4	1	4	4	2	2	1	3	3	3	2	5	5	5	4	3	5	3	5	5
Female	> 20 years	perMaleent contract	45	Primary Care Consultation	>2 years	>2 years	< 6 months	3	2	1	1	1	1	4	1	1	1	3	1	2	2	2	5	5	5	5	5	5	5	5
Female	> 20 years	perMaleent contract	55	Primary Care Consultation	>2 years	1 -2 years	6m-1 year	3	1	2	3	1	4	1	2	1	1	3	4	4	4	5	5	5	3	1	5	1	5	5
Female	11-15 years	perMaleent contract	34	Surgical unit	>2 years	>2 years	< 6 months	3	2	2	4	1	2	4	2	1	2	3	3	3	3	5	5	5	5	5	1	5	5	1
Female	> 20 years	perMaleent contract	49	Primary Care Consultation	>2 years	>2 years	1 -2 years	3	1	1	4	1	4	4	1	1	1	3	1	1	3	5	5	5	5	5	3	5	5	5
Female	11-15 years	Eventual	35	Medical unit	>2 years	6 m- 1year	1 -2 years	3	2	1	4	1	2	4	2	1	2	3	3	3	3	3	3	3	3	2	2	2	3	3
Female	16-20 years	perMaleent contract	43	Medical unit	1 -2 years	never	< 6 months	3	1	1	4	1	4	4	2	1	2	3	2	3	3	3	5	4	4	5	3	3	5	5
Male	16-20 years	perMaleent contract	44	Surgical unit	never	>2 years	>2 years	3	2	2	4	1	3	1	2	3	2	3	2	2	1	5	5	5	4	5	1	3	5	5
Female	5-10 years	Eventual	26	Surgical unit	never	<6 months	1 -2 years	1	2	1	4	1	4	4	2	1	2	3	4	4	5	5	5	5	5	4	4	5	5	4
Female	< 5 years	Eventual	26	Medical unit	never	<6 months	< 6 months	3	2	1	4	1	1	4	2	1	2	3	2	2	2	4	4	4	4	4	3	2	4	3
Female	> 20 years	perMaleent contract	53	Primary Care Consultation	1 -2 years	>2 years	1 -2 years	3	1	2	4	1	2	4	2	1	3	3	2	2	3	5	5	5	5	5	4	4	4	3
Female	> 20 years	perMaleent contract	57	Primary Care Consultation	>2 years	>2 years	1 -2 years	3	1	1	4	1	2	2	2	1	1	3	4	4	3	5	4	5	5	5	4	4	4	5
Female	> 20 years	perMaleent contract	55	Primary Care Consultation	1 -2 years	>2 years	1 -2 years	3	2	1	4	1	3	4	2	3	1	3	3	3	4	5	5	5	4	2	5	5	4	3
Female	> 20 years	perMaleent contract	55	Surgical unit	>2 years	>2 years	1 -2 years	3	2	4	3	2	3	1	2	1	2	3	3	3	3	4	5	2	5	5	5	5	5	5
Female	< 5 years	Eventual	32	Primary Care Consultation	never	never	6m-1 year	3	1	1	3	1	4	4	2	1	3	3	1	1	5	5	5	5	5	5	1	1	5	5
Female	11-15 years	perMaleent contract	35	Medical unit	never	>2 years	1 -2 years	2	1	1	2	1	1	1	2	1	2	3	2	3	4	4	5	5	4	4	4	4	5	5
Female	5-10 years	Eventual	31	Primary Care Consultation	>2 years	never	1 -2 years	3	2	1	2	1	2	1	2	4	2	3	2	3	3	5	4	3	5	2	5	1	5	4
Female	5-10 years	Eventual	28	Pediatrics consultation Primary Care	1 -2 years	>2 years	6m-1 year	3	2	1	4	1	2	4	3	1	3	3	4	4	4	5	5	5	5	5	5	4	5	5
Male	> 20 years	perMaleent contract	44	Pediatrics consultation Primary Care	1 -2 years	>2 years	6m-1 year	3	1	1	4	1	4	4	1	1	1	3	3	3	5	5	5	5	5	2	5	2	5	5
Male	< 5 years	Eventual	27	Primary Care Consultation	>2 years	never	1 -2 years	3	2	2	4	1	3	4	2	1	2	3	4	4	4	4	4	4	4	4	4	4	4	4
Male	16-20 years	perMaleent contract	42	Primary Care Consultation	1 -2 years	>2 years	6m-1 year	1	1	2	2	1	1	1	2	1	1	3	2	2	2	5	5	5	5	4	2	4	5	5
Female	5-10 years	Eventual	27	Medical unit	never	>2 years	< 6 months	3	2	1	2	1	3	1	2	1	1	3	1	2	2	4	3	4	4	3	4	2	4	4
Female	11-15 years	Eventual	32	Primary Care Consultation	>2 years	never	6m-1 year	3	1	3	4	1	4	1	3	1	2	3	3	4	3	5	5	5	4	1	3	1	5	5
Female	> 20 years	perMaleent contract	45	Surgical unit	6 m- 1year	>2 years	1 -2 years	2	1	2	4	1	1	4	3	1	2	3	3	3	4	5	5	5	5	1	2	2	5	3
Female	> 20 years	perMaleent contract	49	Primary Care Consultation	>2 years	>2 years	6m-1 year	3	1	1	4	1	4	4	3	1	2	3	3	3	5	5	5	5	5	4	5	5	5	3
Female	< 5 years	Eventual	26	Medical unit	1 -2 years	>2 years	1 -2 years	3	2	1	4	1	4	2	1	1	1	3	2	2	3	5	5	3	2	3	3	4	4	5
Female	11-15 years	Eventual	37	Medical unit	>2 years	<6 months	1 -2 years	3	2	3	4	1	1	4	2	1	2	3	2	3	3	4	5	4	4	2	2	3	5	4
Female	> 20 years	perMaleent contract	46	Primary Care Consultation	>2 years	>2 years	6m-1 year	3	2	1	4	1	2	4	2	1	2	3	3	4	5	5	5	4	5	4	5	4	5	5
Female	16-20 years	Eventual	40	Primary Care Consultation	>2 years	never	< 6 months	3	1	3	4	1	2	4	2	4	2	1	1	3	3	5	5	5	5	3	1	3	5	3
Female	16-20 years	Eventual	46	Primary Care Consultation	>2 years	>2 years	< 6 months	1	2	1	2	1	4	1	1	1	2	3	2	2	1	5	5	5	4	2	2	3	5	3
Female	5-10 years	Eventual	30	Surgical unit	>2 years	never	1 -2 years	3	1	1	4	1	4	1	1	1	2	3	2	3	5	5	4	3	4	4	3	3	5	4
Female	5-10 years	Eventual	29	Primary Care Consultation	1 -2 years	never	6m-1 year	3	2	3	4	1	4	4	1	1	2	3	2	3	3	5	5	5	3	3	2	5	5	5
Female	> 20 years	perMaleent contract	52	Surgical unit	>2 years	>2 years	6m-1 year	3	1	2	4	1	1	4	2	4	2	3	2	3	3	5	5	4	4	3	1	4	4	4
Female	> 20 years	perMaleent contract	43	Medical unit	>2 years	<6 months	< 6 months	1	2	1	4	1	3	4	2	1	1	3	3	3	5	5	5	5	3	5	5	4	5	4
Female	< 5 years	Eventual	29	Medical unit	>2 years	>2 years	6m-1 year	3	2	1	4	1	4	4	2	1	2	3	2	2	3	5	5	5	5	5	3	3	2	5
Female	> 20 years	Eventual	47	Medical unit	1 -2 years	6 m- 1year	1 -2 years	2	1	1	4	1	4	1	1	3	2	3	3	4	5	5	2	2	5	1	1	1	2	4
Female	5-10 years	Eventual	38	Primary Care Consultation	>2 years	never	1 -2 years	3	2	1	4	1	1	4	2	1	2	3	4	4	5	5	5	5	3	5	1	4	5	5
Female	5-10 years	Eventual	29	Medical unit	never	6 m- 1year	6m-1 year	1	2	1	4	1	4	4	1	1	1	3	2	2	2	1	1	2	2	3	3	3	1	1
Female	5-10 years	Eventual	29	Medical unit	>2 years	>2 years	6m-1 year	3	1	1	2	1	3	4	2	4	1	3	4	2	5	5	5	5	4	5	3	5	5	5
Female	11-15 years	perMaleent contract	36	Primary Care Consultation	1 -2 years	>2 years	6m-1 year	3	1	1	4	1	4	4	1	1	2	3	4	4	5	5	5	4	4	3	2	3	5	3
Female	16-20 years	Eventual	47	Primary Care Consultation	>2 years	never	6m-1 year	3	2	1	4	1	1	4	2	1	2	3	1	3	5	5	5	5	3	5	1	5	5	5
Female	5-10 years	perMaleent contract	30	Medical unit	1 -2 years	never	6m-1 year	3	1	1	4	1	1	4	1	1	2	3	1	2	1	3	3	1	3	2	1	3	3	5
Male	5-10 years	Eventual	30	Primary Care Consultation	>2 years	never	6m-1 year	3	1	1	4	1	1	4	3	1	2	3	4	5	5	5	5	5	5	3	2	3	5	5
Female	> 20 years	perMaleent contract	52	Primary Care Consultation	>2 years	>2 years	6m-1 year	2	1	1	4	1	4	1	1	1	1	3	3	3	3	5	1	4	4	4	5	3	5	3
Female	16-20 years	perMaleent contract	44	Medical unit	>2 years	1 -2 years	1 -2 years	3	1	1	4	1	4	4	1	1	1	3	3	2	4	4	4	4	4	4	3	4	5	5
Male	> 20 years	perMaleent contract	43	Primary Care Consultation	>2 years	<6 months	6m-1 year	3	1	1	4	1	2	4	3	1	2	3	5	3	5	5	5	5	4	2	5	5	5	3
Female	5-10 years	Eventual	29	Medical unit	>2 years	never	6m-1 year	3	1	1	4	1	2	1	3	1	1	3	3	5	3	5	5	5	5	1	5	5	5	5
Female	< 5 years	Eventual	22	Primary Care Consultation	<6 months	1 -2 years	6m-1 year	3	1	2	4	1	1	1	2	1	2	3	2	4	5	5	5	5	3	4	2	1	5	4
Female	5-10 years	Eventual	42	Medical unit	never	6 m- 1year	6m-1 year	3	1	1	4	1	1	4	2	1	2	3	3	3	3	4	4	4	3	3	4	4	4	4
Female	5-10 years	Eventual	30	Medical unit	1 -2 years	never	6m-1 year	3	1	1	3	1	1	1	2	1	2	3	2	2	2	5	5	5	3	2	5	4	5	4
Male	< 5 years	Eventual	26	Primary Care Consultation	>2 years	never	1 -2 years	3	2	1	4	1	4	4	2	4	2	3	3	3	5	5	5	5	5	4	3	3	5	5
Female	16-20 years	Eventual	39	Medical unit	>2 years	6 m- 1year	1 -2 years	3	2	1	4	1	2	1	2	1	1	3	3	4	4	5	5	4	5	3	4	3	4	1
Female	5-10 years	Eventual	32	Medical unit	>2 years	1 -2 years	6m-1 year	3	1	1	4	1	4	4	2	1	2	2	2	2	4	5	4	4	4	3	4	3	4	4
Female	16-20 years	perMaleent contract	42	Surgical unit	1 -2 years	>2 years	6m-1 year	3	1	1	4	1	2	1	2	1	2	1	2	2	3	4	4	1	2	2	2	2	3	3
Female	11-15 years	Eventual	32	Primary Care Consultation	>2 years	never	6m-1 year	3	2	2	4	1	4	2	2	1	3	3	2	4	2	4	5	5	5	1	4	2	5	3
Female	5-10 years	perMaleent contract	32	Medical unit	<6 months	<6 months	1 -2 years	3	1	1	4	1	4	4	1	1	2	3	4	4	5	5	5	5	5	3	5	3	5	5
Female	16-20 years	Eventual	42	Medical unit	1 -2 years	6 m- 1year	6m-1 year	3	1	1	4	1	4	4	1	1	1	3	3	4	3	4	3	3	2	2	2	5	5	3
Female	> 20 years	perMaleent contract	55	Primary Care Consultation	>2 years	>2 years	6m-1 year	3	2	1	3	1	1	1	2	1	2	3	3	3	4	4	4	4	4	3	3	4	4	4
Female	< 5 years	Eventual	26	Primary Care Consultation	1 -2 years	never	6m-1 year	2	1	4	4	1	2	2	2	1	2	3	3	2	4	4	5	5	5	3	3	4	5	5
Female	5-10 years	Eventual	33	Primary Care Consultation	1 -2 years	never	6m-1 year	3	1	1	3	1	1	4	2	1	2	3	2	2	5	4	5	5	5	1	4	3	5	5
Female	16-20 years	perMaleent contract	47	Medical unit	>2 years	<6 months	6m-1 year	3	2	1	2	1	3	1	2	1	1	2	4	4	5	5	5	4	4	2	5	4	5	5
Female	5-10 years	Eventual	33	Surgical unit	>2 years	6 m- 1year	6m-1 year	3	2	1	4	1	1	4	2	1	2	3	3	3	5	5	5	5	4	2	3	4	5	4
Female	5-10 years	Eventual	28	Surgical unit	>2 years	never	1 -2 years	1	2	2	4	1	4	4	4	2	2	3	4	3	4	4	5	5	5	1	5	1	5	2
Female	> 20 years	perMaleent contract	55	Medical unit	>2 years	>2 years	1 -2 years	3	2	1	4	1	1	4	2	1	2	3	2	2	5	5	5	3	5	4	4	4	5	5
Female	5-10 years	Eventual	30	Surgical unit	never	1 -2 years	6m-1 year	3	2	3	4	1	2	1	2	1	2	3	3	3	4	5	5	4	5	5	1	4	5	5
Female	11-15 years	Eventual	34	Surgical unit	>2 years	>2 years	1 -2 years	3	1	2	4	3	4	4	2	1	1	2	2	1	4	4	4	4	2	1	4	2	4	1
Female	16-20 years	Eventual	58	Medical unit	>2 years	6 m- 1year	1 -2 years	3	1	2	4	1	1	4	2	1	3	3	3	3	4	5	5	4	3	3	2	2	5	5
Female	5-10 years	Eventual	27	Pediatric hospital service	>2 years	1 -2 years	1 -2 years	3	2	1	4	1	2	4	1	1	1	3	3	3	5	5	5	5	5	5	4	4	5	5
Female	> 20 years	perMaleent contract	45	Medical unit	1 -2 years	1 -2 years	6m-1 year	3	1	1	4	1	1	4	2	1	2	3	3	4	4	5	5	5	5	2	1	3	5	5
Male	> 20 years	perMaleent contract	54	Surgical unit	>2 years	>2 years	6m-1 year	1	2	2	4	2	4	4	2	1	2	3	4	3	5	5	5	5	1	1	1	5	5	5
Female	< 5 years	Eventual	25	Primary Care Consultation	never	>2 years	6m-1 year	1	2	1	4	1	2	4	3	1	1	3	5	5	5	5	5	5	5	3	3	4	5	5
Female	5-10 years	Eventual	31	Medical unit	<6 months	1 -2 years	1 -2 years	2	2	3	4	1	2	4	2	1	4	1	5	5	5	5	5	5	5	1	1	3	5	5
Female	5-10 years	Eventual	30	Medical unit	never	>2 years	6m-1 year	3	2	1	2	1	1	1	2	1	2	3	4	3	4	5	5	4	4	3	2	3	5	5
Female	5-10 years	perMaleent contract	27	Medical unit	>2 years	1 -2 years	6m-1 year	3	1	3	4	1	2	4	1	1	1	3	2	3	5	4	5	5	1	2	1	1	5	4
Female	5-10 years	Eventual	37	Medical unit	>2 years	1 -2 years	6m-1 year	3	1	1	2	1	1	4	2	1	1	3	2	2	4	5	5	5	5	5	1	2	5	5
Female	> 20 years	perMaleent contract	49	Medical unit	1 -2 years	>2 years	6m-1 year	3	2	1	4	1	4	4	2	1	2	3	3	2	5	5	5	4	4	3	4	4	5	5
Female	> 20 years	perMaleent contract	49	Surgical unit	6 m- 1year	6 m- 1year	6m-1 year	3	2	1	4	1	2	1	3	1	2	3	4	4	3	5	5	5	4	5	5	5	4	3
Male	> 20 years	perMaleent contract	49	Surgical unit	6 m- 1year	>2 years	1 -2 years	3	2	1	4	1	1	1	2	1	2	3	3	4	5	5	5	5	5	5	2	2	5	5
Female	5-10 years	perMaleent contract	29	Medical unit	>2 years	>2 years	1 -2 years	3	2	1	4	1	3	4	1	2	1	3	3	3	4	5	4	5	5	3	2	4	5	4
Female	16-20 years	Eventual	43	Medical unit	>2 years	>2 years	6m-1 year	3	2	1	4	1	4	4	1	2	2	3	2	3	5	5	4	5	3	3	3	3	5	5
Female	5-10 years	Eventual	32	Medical unit	1 -2 years	never	6m-1 year	1	2	1	4	1	4	4	2	1	2	3	2	2	5	5	5	5	5	5	4	5	5	5
Female	> 20 years	perMaleent contract	52	Primary Care Consultation	>2 years	6 m- 1year	6m-1 year	3	1	1	4	1	1	1	3	1	2	3	3	4	5	2	5	5	5	1	5	5	5	5
Male	16-20 years	perMaleent contract	55	Primary Care Consultation	1 -2 years	>2 years	6m-1 year	2	1	1	4	1	4	1	2	1	2	2	1	1	5	5	5	5	5	4	5	5	5	5
Male	> 20 years	perMaleent contract	51	Medical unit	>2 years	>2 years	6m-1 year	2	3	3	2	1	4	1	1	4	2	3	3	3	3	4	4	5	4	4	4	2	4	4
Female	11-15 years	Eventual	36	Medical unit	>2 years	never	6m-1 year	3	2	1	3	3	1	1	2	1	2	1	1	1	4	4	5	5	2	3	4	3	4	3
Female	16-20 years	perMaleent contract	39	Medical unit	>2 years	>2 years	1 -2 years	3	2	1	4	1	1	4	1	1	2	3	3	3	4	5	4	4	4	2	4	4	5	4
Female	> 20 years	perMaleent contract	54	Primary Care Consultation	1 -2 years	>2 years	< 6 months	3	1	2	3	1	1	4	2	1	1	3	3	3	3	4	5	5	5	4	3	4	5	5
Female	> 20 years	perMaleent contract	57	Pediatrics consultation Primary Care	>2 years	never	1 -2 years	2	3	4	2	1	4	1	1	1	4	3	1	3	5	5	5	4	3	3	3	3	4	5
Female	11-15 years	Eventual	38	Medical unit	1 -2 years	>2 years	6m-1 year	1	2	1	4	1	1	4	2	1	1	3	3	4	5	5	4	4	3	2	5	3	5	4
Female	> 20 years	perMaleent contract	49	Medical unit	>2 years	>2 years	6m-1 year	3	1	1	4	1	2	4	3	1	1	3	4	4	4	5	3	5	5	5	5	5	5	5
Female	11-15 years	perMaleent contract	46	Medical unit	>2 years	>2 years	1 -2 years	3	1	1	4	1	1	4	1	1	2	3	2	2	3	4	5	5	5	4	4	4	5	5
Female	> 20 years	perMaleent contract	48	Medical unit	>2 years	<6 months	6m-1 year	2	1	4	4	1	4	4	1	1	1	3	2	3	3	5	5	5	3	3	1	3	3	1
Female	> 20 years	perMaleent contract	47	Primary Care Consultation	6 m- 1year	>2 years	6m-1 year	3	1	1	2	1	1	4	2	4	3	3	1	2	4	5	5	5	5	3	5	3	5	5
Male	5-10 years	Eventual	30	Medical unit	>2 years	1 -2 years	6m-1 year	1	2	1	4	1	1	4	3	1	2	3	5	4	1	5	5	5	5	5	2	4	5	3
Male	> 20 years	perMaleent contract	55	Primary Care Consultation	1 -2 years	1 -2 years	6m-1 year	3	1	1	3	1	2	1	3	1	2	3	3	4	2	5	5	5	5	1	2	2	4	5
Female	5-10 years	Eventual	30	Medical unit	never	6 m- 1year	6m-1 year	3	2	2	4	1	4	4	2	1	2	3	3	3	3	5	5	5	1	5	5	5	5	5
Female	> 20 years	perMaleent contract	48	Medical unit	1 -2 years	never	6m-1 year	2	1	2	4	1	4	4	2	1	2	3	2	2	5	5	5	5	5	1	5	1	4	5
Female	11-15 years	Eventual	36	Surgical unit	6 m- 1year	<6 months	6m-1 year	3	1	1	4	1	1	4	1	1	1	3	4	4	5	5	5	5	5	1	5	3	5	1
Female	11-15 years	Eventual	40	Medical unit	>2 years	>2 years	1 -2 years	3	2	1	4	1	4	4	2	1	2	3	3	3	3	3	4	4	3	2	3	2	4	4
Female	5-10 years	Eventual	29	Primary Care Consultation	never	never	1 -2 years	3	2	1	4	1	1	4	1	1	4	3	2	1	2	5	4	5	5	3	5	3	5	3
Female	11-15 years	perMaleent contract	36	Medical unit	>2 years	<6 months	6m-1 year	3	1	1	4	1	1	4	1	1	1	3	4	4	4	5	3	5	4	5	4	5	5	5
Female	5-10 years	Eventual	34	Primary Care Consultation	>2 years	never	1 -2 years	3	1	2	2	1	1	1	2	1	2	3	2	2	3	4	5	5	5	4	4	2	5	5
Male	16-20 years	perMaleent contract	41	Surgical unit	<6 months	6 m- 1year	6m-1 year	3	2	1	4	1	2	4	3	1	2	3	5	5	4	5	5	5	5	3	3	3	5	3
Female	> 20 years	perMaleent contract	61	Medical unit	1 -2 years	6 m- 1year	1 -2 years	3	1	2	2	1	1	2	2	1	3	3	2	2	3	5	5	5	1	1	1	1	1	5
Male	11-15 years	perMaleent contract	46	Primary Care Consultation	1 -2 years	>2 years	6m-1 year	3	2	4	4	1	3	4	2	1	3	3	3	3	4	4	5	5	5	3	2	5	5	5
Female	> 20 years	perMaleent contract	57	Surgical unit	<6 months	6 m- 1year	< 6 months	3	1	1	2	1	4	4	1	1	2	3	4	4	3	5	4	5	5	4	3	5	5	2
Female	> 20 years	perMaleent contract	51	Primary Care Consultation	>2 years	1 -2 years	6m-1 year	3	2	2	2	1	2	2	2	1	2	3	2	3	4	5	2	5	4	2	4	2	5	5
Female	> 20 years	perMaleent contract	53	Primary Care Consultation	>2 years	never	6m-1 year	3	2	2	4	1	4	1	1	1	4	3	1	1	5	5	5	5	5	1	5	3	5	5
Female	> 20 years	perMaleent contract	61	Medical unit	never	never	1 -2 years	1	1	2	1	3	2	1	1	1	2	3	1	1	1	5	5	4	4	1	1	4	5	5
Female	< 5 years	Eventual	30	Primary Care Consultation	>2 years	never	1 -2 years	3	2	1	4	1	1	1	3	1	2	3	3	3	5	5	4	5	4	3	1	3	4	4
Male	5-10 years	Eventual	31	Medical unit	never	1 -2 years	1 -2 years	3	1	1	4	1	1	4	1	1	1	1	3	3	2	2	5	5	4	3	4	2	5	4
Male	> 20 years	perMaleent contract	61	Primary Care Consultation	1 -2 years	>2 years	1 -2 years	1	2	3	2	1	2	4	2	1	2	3	3	3	4	5	5	4	3	4	3	3	4	2
Female	> 20 years	perMaleent contract	53	Primary Care Consultation	>2 years	>2 years	6m-1 year	1	2	1	4	1	1	4	1	1	2	3	4	4	5	5	5	5	5	5	4	2	5	5
Female	11-15 years	perMaleent contract	45	Medical unit	1 -2 years	1 -2 years	1 -2 years	3	2	1	4	1	4	4	2	1	2	3	3	3	4	5	4	4	4	4	4	4	5	4
Female	11-15 years	Eventual	35	Medical unit	never	>2 years	1 -2 years	3	2	2	1	1	1	1	2	1	2	3	2	2	3	5	5	5	5	4	4	4	5	5
Female	< 5 years	Eventual	32	Primary Care Consultation	>2 years	>2 years	1 -2 years	2	1	3	4	1	2	2	1	1	1	3	3	3	2	5	4	4	4	3	4	4	5	4
Female	16-20 years	perMaleent contract	47	Surgical unit	6 m- 1year	6 m- 1year	1 -2 years	3	2	3	4	1	2	1	1	1	2	3	3	4	3	4	5	5	5	2	5	2	4	4
Female	< 5 years	Eventual	27	Medical unit	never	never	1 -2 years	1	2	1	4	1	1	4	1	1	3	2	3	3	3	4	4	4	3	2	3	3	4	4
Female	< 5 years	Eventual	26	Primary Care Consultation	never	never	6m-1 year	3	2	3	4	1	4	4	3	1	2	3	1	1	3	5	5	5	4	4	3	4	5	5
Female	> 20 years	perMaleent contract	58	Surgical unit	>2 years	>2 years	1 -2 years	3	1	1	4	1	3	4	1	1	3	3	3	4	4	5	5	5	5	3	4	4	5	2
Female	> 20 years	perMaleent contract	48	Pediatrics consultation Primary Care	6 m- 1year	>2 years	< 6 months	2	3	2	2	1	4	2	2	1	2	3	3	3	3	4	2	4	5	5	3	3	5	4
Male	< 5 years	Eventual	37	Primary Care Consultation	never	never	6m-1 year	3	1	1	4	1	1	2	2	1	2	3	3	3	4	4	5	5	5	3	5	4	5	5
Female	> 20 years	perMaleent contract	44	Primary Care Consultation	6 m- 1year	>2 years	6m-1 year	3	1	2	4	1	4	1	2	1	2	3	3	3	5	5	5	3	5	4	5	1	5	5
Female	11-15 years	Eventual	41	Surgical unit	<6 months	>2 years	1 -2 years	3	1	1	4	1	1	4	3	1	2	3	5	5	5	5	5	5	5	5	3	5	3	2
Female	> 20 years	perMaleent contract	48	Medical unit	>2 years	>2 years	1 -2 years	3	2	1	4	1	4	4	2	1	1	3	5	5	3	5	5	5	5	3	5	1	5	5
Female	> 20 years	perMaleent contract	48	Medical unit	>2 years	<6 months	6m-1 year	3	1	4	4	1	4	2	1	1	2	3	3	3	3	5	5	5	4	5	5	4	5	5
Female	> 20 years	perMaleent contract	57	Primary Care Consultation	>2 years	>2 years	6m-1 year	3	2	1	4	1	2	1	1	1	4	3	4	4	4	5	5	5	5	4	4	4	5	5
Female	5-10 years	Eventual	26	Medical unit	never	>2 years	1 -2 years	3	2	1	3	1	2	4	1	1	1	3	2	1	4	5	5	5	5	3	5	3	5	5
Female	5-10 years	perMaleent contract	28	Surgical unit	1 -2 years	<6 months	1 -2 years	3	2	1	4	1	4	4	1	1	2	3	3	3	3	5	5	5	4	4	2	2	5	4
Female	11-15 years	Eventual	35	Primary Care Consultation	1 -2 years	never	6m-1 year	3	1	1	4	1	4	4	1	1	2	3	3	3	4	5	5	4	5	4	2	4	5	4
Female	11-15 years	perMaleent contract	33	Surgical unit	>2 years	1 -2 years	< 6 months	2	1	1	4	1	2	2	1	1	2	3	3	4	5	5	5	5	4	3	1	3	5	5
Female	5-10 years	Eventual	31	Medical unit	<6 months	never	6m-1 year	3	2	1	4	1	2	4	1	1	2	3	3	4	5	5	5	5	5	3	4	3	5	4
Female	5-10 years	Eventual	30	Medical unit	<6 months	>2 years	6m-1 year	3	1	3	4	1	4	4	1	1	1	1	3	2	5	5	5	5	4	1	1	2	5	1
Female	11-15 years	Eventual	31	Surgical unit	>2 years	1 -2 years	6m-1 year	3	1	1	4	1	4	4	2	1	2	3	3	4	5	5	5	5	3	4	4	4	5	4
Female	5-10 years	Eventual	31	Medical unit	never	never	< 6 months	3	1	1	4	1	2	1	2	1	2	3	1	1	5	3	5	5	1	5	4	3	5	5
Female	< 5 years	Eventual	25	Surgical unit	>2 years	never	6m-1 year	3	2	1	4	1	2	4	1	1	2	3	4	3	4	5	5	5	5	3	4	2	5	4
Female	5-10 years	Eventual	36	Medical unit	>2 years	<6 months	< 6 months	3	1	2	2	3	1	4	2	1	2	1	3	3	2	5	5	5	5	4	4	3	5	5
Female	11-15 years	perMaleent contract	32	Medical unit	never	<6 months	6m-1 year	3	1	3	4	1	2	4	1	1	2	3	3	2	5	5	5	5	5	5	1	4	5	5
Female	16-20 years	perMaleent contract	44	Medical unit	>2 years	<6 months	6m-1 year	3	1	1	4	1	2	4	3	1	1	3	3	3	4	4	5	5	2	3	4	4	5	3
Female	5-10 years	Eventual	29	Pediatric hospital service	1 -2 years	6 m- 1year	< 6 months	3	1	2	4	1	3	1	2	2	3	3	3	4	5	5	5	5	2	4	4	4	5	4
Female	11-15 years	perMaleent contract	36	Medical unit	1 -2 years	<6 months	6m-1 year	3	1	1	4	1	2	4	1	1	2	3	3	4	5	5	5	3	3	4	2	4	5	2
Female	> 20 years	perMaleent contract	45	Medical unit	6 m- 1year	1 -2 years	< 6 months	3	2	1	4	1	4	4	2	1	1	3	4	4	3	4	5	5	4	4	4	3	5	4
Female	16-20 years	perMaleent contract	41	Pediatric hospital service	>2 years	>2 years	6m-1 year	3	2	1	2	1	4	1	1	1	1	3	3	3	4	5	3	3	2	4	3	3	5	5
Female	11-15 years	Eventual	40	Surgical unit	>2 years	>2 years	6m-1 year	3	2	1	4	1	4	4	2	1	1	3	3	3	4	5	5	5	5	4	4	4	5	5
Female	16-20 years	Eventual	46	Pediatric hospital service	never	<6 months	6m-1 year	1	2	1	2	1	4	1	2	1	2	2	3	2	5	5	5	5	1	4	5	3	5	1
Female	5-10 years	perMaleent contract	30	Medical unit	>2 years	>2 years	6m-1 year	3	2	1	4	1	4	4	2	1	2	3	3	4	3	5	4	5	5	4	5	3	5	5
Female	11-15 years	perMaleent contract	36	Surgical unit	>2 years	1 -2 years	< 6 months	3	1	3	4	1	4	1	2	1	2	3	4	4	5	5	1	5	3	1	1	3	5	3
Female	11-15 years	Eventual	42	Medical unit	>2 years	<6 months	6m-1 year	3	1	1	4	1	1	4	2	1	2	3	5	5	5	5	3	5	3	4	3	3	5	3
Male	< 5 years	Eventual	30	Medical unit	>2 years	1 -2 years	6m-1 year	3	2	2	4	1	1	2	2	1	1	3	1	1	3	5	5	3	3	3	3	3	5	3
Male	> 20 years	perMaleent contract	48	Surgical unit	never	never	>2 years	3	2	4	2	1	2	1	2	1	4	2	3	2	2	3	5	5	5	5	5	4	2	1
Female	> 20 years	perMaleent contract	53	Pediatric hospital service	>2 years	>2 years	6m-1 year	3	1	1	4	1	2	2	1	1	1	3	3	4	4	5	5	5	5	3	2	3	5	3
Female	11-15 years	Eventual	45	Medical unit	never	>2 years	6m-1 year	3	1	2	4	1	4	4	2	2	1	1	3	2	2	5	5	4	5	5	3	4	5	5
Female	5-10 years	Eventual	30	Medical unit	never	>2 years	1 -2 years	3	2	1	4	1	1	4	1	1	2	3	2	3	3	4	4	4	4	4	3	5	5	5
Female	11-15 years	perMaleent contract	36	Surgical unit	>2 years	>2 years	6m-1 year	3	2	1	2	1	1	1	1	1	1	3	1	1	5	5	5	5	5	3	2	4	5	3
Female	> 20 years	perMaleent contract	37	Medical unit	never	>2 years	6m-1 year	1	2	1	4	1	4	4	1	1	2	3	3	3	1	5	5	5	5	4	5	4	5	4
Female	< 5 years	Eventual	27	Medical unit	>2 years	>2 years	6m-1 year	3	2	1	4	1	1	4	2	1	2	3	4	3	3	5	5	5	4	4	5	4	5	4
Female	16-20 years	perMaleent contract	41	Pediatric hospital service	>2 years	>2 years	1 -2 years	3	2	1	2	1	2	4	2	1	1	3	2	2	4	5	5	5	5	5	2	5	5	5
Female	11-15 years	perMaleent contract	38	Medical unit	1 -2 years	>2 years	6m-1 year	3	2	1	2	1	2	1	1	1	2	3	2	2	4	2	4	4	4	2	3	3	3	3
Female	5-10 years	Eventual	30	Medical unit	>2 years	>2 years	< 6 months	3	3	2	4	1	2	4	2	1	2	3	1	3	3	3	4	5	5	2	3	3	5	5
Female	11-15 years	perMaleent contract	40	Medical unit	>2 years	>2 years	1 -2 years	3	1	3	4	1	4	4	3	1	1	3	3	3	5	5	5	5	3	5	5	5	5	5
Female	11-15 years	Eventual	38	Medical unit	<6 months	>2 years	6m-1 year	1	2	1	4	1	1	4	3	1	1	3	2	2	3	5	5	4	5	1	1	3	5	5
Female	> 20 years	perMaleent contract	58	Primary Care Consultation	>2 years	>2 years	6m-1 year	3	2	2	2	1	4	1	2	1	1	3	2	3	3	5	5	5	5	2	3	3	5	2
Female	11-15 years	Eventual	34	Medical unit	1 -2 years	<6 months	6m-1 year	2	1	3	4	1	4	1	2	1	1	3	3	3	2	4	4	4	4	1	1	1	3	3
Female	5-10 years	Eventual	27	Medical unit	1 -2 years	<6 months	< 6 months	1	2	1	4	2	4	4	1	1	2	3	4	4	3	5	5	5	3	2	1	4	5	5
Female	> 20 years	perMaleent contract	55	Primary Care Consultation	>2 years	>2 years	6m-1 year	3	1	1	4	1	4	4	1	1	1	3	4	4	5	5	5	5	4	3	4	3	3	5
Female	5-10 years	Eventual	37	Medical unit	1 -2 years	6 m- 1year	6m-1 year	3	1	1	4	1	1	4	2	1	1	3	2	2	5	5	5	5	5	5	1	5	5	5
Female	5-10 years	Eventual	30	Surgical unit	>2 years	<6 months	>2 years	3	2	1	4	1	1	4	2	2	2	3	4	4	5	5	5	5	5	3	4	4	5	2
Female	< 5 years	Eventual	24	Medical unit	6 m- 1year	never	6m-1 year	3	2	1	4	1	2	4	2	1	1	3	3	3	5	5	4	5	4	4	3	3	5	5
Female	11-15 years	perMaleent contract	47	Surgical unit	>2 years	<6 months	1 -2 years	1	2	1	4	1	4	4	3	1	2	3	3	3	3	5	5	5	5	5	4	5	5	4
Female	> 20 years	perMaleent contract	47	Primary Care Consultation	>2 years	>2 years	6m-1 year	3	1	1	2	1	4	1	2	1	2	3	3	3	5	2	5	3	4	2	4	5	5	5
Female	11-15 years	perMaleent contract	37	Primary Care Consultation	1 -2 years	>2 years	>2 years	1	2	1	3	1	4	4	2	1	2	3	3	3	4	5	5	4	3	1	5	3	5	5
Female	> 20 years	perMaleent contract	47	Primary Care Consultation	>2 years	never	6m-1 year	1	2	1	4	1	1	4	2	1	4	3	1	2	5	5	5	5	5	2	4	3	5	5
Female	> 20 years	perMaleent contract	55	Primary Care Consultation	>2 years	never	1 -2 years	3	2	1	4	1	2	1	2	1	2	3	3	3	4	5	5	5	5	1	3	1	5	5
Male	> 20 years	Eventual	46	Medical unit	>2 years	1 -2 years	6m-1 year	3	2	2	4	1	4	4	1	1	2	3	2	1	2	5	5	5	5	5	4	4	5	5
Male	< 5 years	Eventual	34	Medical unit	1 -2 years	1 -2 years	< 6 months	3	1	1	3	1	2	2	1	1	2	3	2	2	5	5	5	5	5	3	5	5	5	4
Male	11-15 years	perMaleent contract	34	Medical unit	>2 years	1 -2 years	6m-1 year	3	2	1	4	1	1	4	1	1	2	3	3	3	4	5	5	5	5	4	4	5	5	5
Female	> 20 years	perMaleent contract	59	Primary Care Consultation	>2 years	never	6m-1 year	1	2	1	2	1	4	4	2	1	2	3	2	3	3	5	5	5	5	3	3	3	3	3
Female	11-15 years	Eventual	33	Surgical unit	>2 years	1 -2 years	< 6 months	3	2	1	4	1	2	2	1	1	3	3	2	3	5	5	5	5	5	1	5	5	5	5
Female	> 20 years	perMaleent contract	51	Surgical unit	6 m- 1year	1 -2 years	6m-1 year	3	1	1	4	1	2	4	1	1	1	3	4	4	4	5	5	5	4	4	4	4	5	4
Male	16-20 years	perMaleent contract	49	Primary Care Consultation	1 -2 years	>2 years	6m-1 year	3	1	1	2	1	4	4	1	1	2	3	3	3	4	4	5	5	4	3	4	3	4	4
Female	5-10 years	Eventual	31	Medical unit	>2 years	>2 years	1 -2 years	3	2	3	4	1	4	1	2	1	2	2	4	4	4	5	5	5	5	4	3	2	5	5
Female	5-10 years	Eventual	28	Medical unit	1 -2 years	never	1 -2 years	3	2	1	2	1	4	1	2	1	2	1	3	3	5	5	4	4	3	3	4	1	4	4
Female	> 20 years	perMaleent contract	49	Pediatrics consultation Primary Care	>2 years	>2 years	6m-1 year	3	2	2	1	1	4	4	2	1	2	3	3	3	3	5	5	5	5	4	5	5	5	5
Female	5-10 years	Eventual	33	Medical unit	>2 years	>2 years	6m-1 year	3	1	2	4	1	4	4	1	1	2	3	1	2	1	5	5	5	5	4	2	3	5	5
Female	> 20 years	perMaleent contract	54	Primary Care Consultation	>2 years	>2 years	6m-1 year	3	2	1	2	1	4	1	1	1	3	3	4	4	4	5	4	5	5	2	3	2	4	5
Female	< 5 years	Eventual	28	Medical unit	>2 years	6 m- 1year	1 -2 years	1	2	1	4	1	2	4	3	1	2	3	3	3	2	5	5	5	5	2	1	1	4	4
Female	> 20 years	perMaleent contract	48	Medical unit	<6 months	>2 years	< 6 months	3	1	1	4	1	4	4	1	1	3	3	2	3	5	5	5	5	5	1	4	1	5	4
Female	> 20 years	perMaleent contract	55	Surgical unit	<6 months	>2 years	6m-1 year	3	1	1	4	1	4	4	1	1	3	3	2	3	5	5	5	5	5	1	4	1	5	4
Female	5-10 years	Eventual	28	Medical unit	never	<6 months	1 -2 years	3	1	1	4	1	4	4	2	1	2	3	4	4	5	5	5	5	5	3	4	3	5	4
Female	> 20 years	perMaleent contract	61	Primary Care Consultation	<6 months	>2 years	6m-1 year	3	1	2	4	1	4	1	2	1	4	3	3	3	5	5	5	5	5	1	5	5	5	5
Female	> 20 years	perMaleent contract	54	Primary Care Consultation	6 m- 1year	1 -2 years	6m-1 year	3	2	3	2	3	1	2	2	1	3	3	4	4	4	5	5	5	5	1	4	2	5	5
Female	16-20 years	perMaleent contract	50	Primary Care Consultation	6 m- 1year	>2 years	< 6 months	3	2	1	4	1	4	4	2	1	2	3	3	3	5	5	4	3	5	3	2	3	5	5
Female	5-10 years	Eventual	29	Medical unit	6 m- 1year	<6 months	6m-1 year	3	2	1	4	1	1	4	2	1	1	3	4	4	4	5	4	4	3	3	3	3	5	4
Female	> 20 years	perMaleent contract	44	Surgical unit	>2 years	>2 years	6m-1 year	3	1	1	4	1	2	4	1	1	1	3	3	2	1	5	5	5	5	3	3	3	5	5
Male	< 5 years	Eventual	24	Medical unit	<6 months	<6 months	< 6 months	3	1	1	4	1	4	4	3	1	2	3	3	5	3	5	5	5	4	5	4	5	5	5
Female	5-10 years	Eventual	31	Medical unit	never	>2 years	1 -2 years	3	1	3	4	1	2	4	2	1	2	3	2	3	3	5	5	4	5	3	3	4	5	3
Female	< 5 years	Eventual	29	Primary Care Consultation	6 m- 1year	never	6m-1 year	3	2	1	4	1	2	4	1	1	2	3	3	1	4	4	5	5	5	5	2	1	5	5
Female	> 20 years	perMaleent contract	55	Primary Care Consultation	>2 years	>2 years	6m-1 year	3	1	1	4	1	2	4	2	1	2	3	3	3	4	5	5	5	5	5	3	3	5	3
Female	< 5 years	Eventual	27	Surgical unit	<6 months	<6 months	< 6 months	3	2	1	4	2	2	4	1	1	1	3	5	5	3	5	5	5	5	1	1	5	5	5
Male	5-10 years	Eventual	30	Medical unit	>2 years	6 m- 1year	1 -2 years	1	2	1	4	2	1	4	2	1	2	3	3	3	3	5	3	2	3	1	2	3	2	2
Male	< 5 years	Eventual	30	Primary Care Consultation	>2 years	>2 years	6m-1 year	3	1	1	4	1	4	4	1	1	2	3	4	3	4	5	5	5	5	2	4	2	4	4
Female	> 20 years	perMaleent contract	60	Medical unit	>2 years	>2 years	6m-1 year	2	1	3	4	1	1	4	1	1	1	3	2	3	4	5	5	5	5	4	3	4	5	5
Male	16-20 years	perMaleent contract	50	Primary Care Consultation	1 -2 years	1 -2 years	1 -2 years	3	1	1	4	2	2	4	1	1	2	3	4	4	5	4	5	5	5	4	5	3	4	4
Female	> 20 years	perMaleent contract	48	Primary Care Consultation	1 -2 years	>2 years	6m-1 year	3	2	3	4	1	2	4	2	3	2	3	1	1	4	4	5	5	5	2	1	1	5	5
Female	16-20 years	Eventual	47	Primary Care Consultation	never	never	< 6 months	3	2	2	2	1	4	1	2	4	1	1	1	1	5	5	5	5	5	1	5	1	3	3
Female	> 20 years	perMaleent contract	49	Primary Care Consultation	1 -2 years	>2 years	6m-1 year	3	2	1	4	1	2	1	1	1	1	3	4	4	5	5	5	5	4	4	4	5	5	5
Female	> 20 years	perMaleent contract	53	Medical unit	>2 years	>2 years	1 -2 years	3	2	1	4	1	2	4	2	1	2	3	3	3	3	4	4	4	4	5	4	2	5	5
Female	> 20 years	perMaleent contract	47	Primary Care Consultation	1 -2 years	>2 years	< 6 months	2	1	1	4	1	2	4	1	1	2	3	3	4	4	4	5	4	4	3	3	2	5	5
Female	< 5 years	Eventual	25	Primary Care Consultation	1 -2 years	never	6m-1 year	3	2	1	4	1	2	4	2	1	1	3	2	3	5	5	5	5	5	3	4	1	5	5
Female	> 20 years	perMaleent contract	48	Surgical unit	1 -2 years	>2 years	1 -2 years	3	2	2	4	1	4	1	2	1	2	3	3	3	3	5	5	5	5	4	5	5	5	5
Female	> 20 years	perMaleent contract	55	Surgical unit	never	<6 months	6m-1 year	2	1	2	1	1	4	4	2	3	2	3	2	3	5	5	5	5	3	3	4	4	5	5
Male	< 5 years	Eventual	25	Medical unit	1 -2 years	<6 months	< 6 months	3	1	1	4	1	1	4	1	1	4	3	3	4	5	5	5	5	5	5	2	2	5	5
Female	> 20 years	perMaleent contract	60	Primary Care Consultation	>2 years	>2 years	1 -2 years	3	1	2	4	1	1	2	2	1	2	3	3	3	3	3	5	5	5	3	3	5	5	4
Female	> 20 years	perMaleent contract	48	Surgical unit	>2 years	>2 years	6m-1 year	3	1	1	4	1	4	4	2	1	2	3	3	3	3	5	5	5	5	5	5	4	5	5
Female	> 20 years	perMaleent contract	56	Pediatrics consultation Primary Care	1 -2 years	>2 years	>2 years	2	1	1	4	1	1	2	2	1	1	3	3	3	5	5	5	5	5	2	5	5	5	5
Female	> 20 years	perMaleent contract	55	Surgical unit	6 m- 1year	6 m- 1year	1 -2 years	1	2	1	4	1	1	4	1	1	2	3	5	5	5	5	5	5	5	3	3	1	5	1
Male	< 5 years	Eventual	22	Primary Care Consultation	1 -2 years	never	1 -2 years	1	1	1	4	1	4	4	1	4	3	3	4	4	5	5	5	5	5	2	4	5	5	5
Female	11-15 years	perMaleent contract	37	Medical unit	6 m- 1year	>2 years	< 6 months	3	1	1	4	1	1	4	1	1	2	3	4	4	5	5	5	5	5	4	4	3	5	5
Male	< 5 years	Eventual	27	Medical unit	>2 years	6 m- 1year	< 6 months	3	2	1	3	1	4	4	4	2	2	3	3	3	3	5	4	4	2	2	1	3	5	4
Female	> 20 years	perMaleent contract	46	Surgical unit	1 -2 years	>2 years	6m-1 year	3	2	1	4	1	4	4	2	1	2	3	4	4	5	5	5	5	4	5	4	3	5	5
Female	16-20 years	perMaleent contract	42	Medical unit	>2 years	6 m- 1year	1 -2 years	3	2	1	4	1	4	4	3	1	1	3	4	4	4	4	5	5	5	5	1	4	5	5
Female	> 20 years	perMaleent contract	46	Primary Care Consultation	>2 years	>2 years	1 -2 years	3	1	1	4	1	1	4	2	1	3	3	3	3	5	5	5	5	5	5	5	3	5	3
Female	16-20 years	perMaleent contract	47	Medical unit	>2 years	>2 years	1 -2 years	3	2	1	4	1	2	2	2	1	1	3	2	2	3	5	5	5	5	4	5	5	5	5
Female	5-10 years	Eventual	28	Medical unit	<6 months	>2 years	1 -2 years	1	2	1	4	1	3	4	1	1	2	3	3	3	4	5	4	5	5	3	1	4	5	5
Female	> 20 years	perMaleent contract	51	Pediatrics consultation Primary Care	>2 years	never	1 -2 years	2	2	3	4	1	1	4	2	1	4	3	1	1	1	5	5	5	5	5	4	3	5	4
Female	11-15 years	perMaleent contract	40	Surgical unit	>2 years	>2 years	6m-1 year	3	1	3	4	1	4	4	2	1	1	3	3	3	3	5	4	3	4	3	3	4	4	4
Female	> 20 years	perMaleent contract	57	Medical unit	1 -2 years	>2 years	1 -2 years	3	2	2	2	1	1	4	2	1	2	3	2	2	4	4	1	1	5	1	5	5	5	4
Female	< 5 years	Eventual	27	Medical unit	>2 years	6 m- 1year	1 -2 years	3	2	4	3	1	3	4	1	1	2	3	3	4	4	4	4	4	3	5	4	4	4	4
Female	< 5 years	Eventual	25	Primary Care Consultation	never	>2 years	6m-1 year	3	1	2	3	1	2	4	1	1	2	3	2	2	4	2	5	5	5	5	1	4	5	5
Female	> 20 years	perMaleent contract	55	Primary Care Consultation	>2 years	never	1 -2 years	2	1	1	4	1	1	2	2	1	2	3	3	3	3	3	3	5	5	3	5	5	5	5
Female	5-10 years	Eventual	29	Medical unit	6 m- 1year	1 -2 years	6m-1 year	2	3	1	4	1	1	4	3	1	2	3	4	4	3	5	5	5	5	2	5	3	5	5
Female	11-15 years	perMaleent contract	36	Medical unit	>2 years	6 m- 1year	6m-1 year	3	1	1	4	1	4	4	1	1	1	3	3	3	4	5	3	3	5	5	5	2	5	5
Female	> 20 years	Eventual	43	Medical unit	1 -2 years	>2 years	6m-1 year	3	1	1	4	2	4	2	1	1	2	3	4	4	5	5	4	5	4	3	3	3	4	3
Male	11-15 years	Eventual	33	Medical unit	>2 years	1 -2 years	6m-1 year	2	2	1	2	1	2	4	2	1	2	1	3	3	5	5	3	3	3	3	3	3	4	3
Female	< 5 years	Eventual	25	Medical unit	>2 years	never	6m-1 year	1	2	1	4	1	4	1	2	1	3	3	3	2	3	5	5	4	3	2	4	2	3	3
Female	> 20 years	perMaleent contract	61	Primary Care Consultation	>2 years	>2 years	1 -2 years	2	1	2	2	1	3	4	3	1	4	3	4	3	3	5	5	5	3	1	3	3	5	1
Male	16-20 years	perMaleent contract	41	Medical unit	>2 years	>2 years	1 -2 years	3	2	1	4	1	1	4	2	1	3	3	3	4	4	4	4	4	4	4	4	4	4	3
Male	11-15 years	perMaleent contract	33	Primary Care Consultation	>2 years	never	6m-1 year	3	2	1	4	1	1	1	1	1	3	3	3	3	5	5	5	5	4	3	5	3	5	3
Female	< 5 years	Eventual	25	Medical unit	>2 years	>2 years	6m-1 year	3	2	1	3	1	4	4	1	1	2	3	2	2	3	5	5	5	5	3	3	4	5	5
Female	11-15 years	Eventual	40	Surgical unit	>2 years	>2 years	1 -2 years	1	2	1	4	1	4	4	1	1	1	3	4	4	3	5	5	4	4	3	5	4	4	4
Female	5-10 years	Eventual	28	Medical unit	>2 years	never	< 6 months	3	2	3	4	1	4	1	3	1	1	3	3	3	3	5	5	3	1	5	3	5	5	5
Female	> 20 years	perMaleent contract	60	Pediatrics consultation Primary Care	<6 months	>2 years	6m-1 year	3	1	1	4	1	2	4	1	1	3	3	4	4	4	5	5	5	5	5	5	3	5	3
Female	> 20 years	perMaleent contract	50	Primary Care Consultation	1 -2 years	>2 years	6m-1 year	3	2	1	1	1	1	4	1	1	3	3	3	3	4	4	2	4	4	1	1	2	3	4
Female	> 20 years	perMaleent contract	61	Medical unit	>2 years	never	6m-1 year	3	2	2	4	1	3	2	2	4	2	3	2	2	4	4	4	3	3	3	4	3	4	1
Female	5-10 years	Eventual	30	Medical unit	>2 years	1 -2 years	1 -2 years	1	2	1	2	1	4	4	2	1	2	3	3	3	5	5	4	4	5	1	1	2	5	4
Female	> 20 years	Eventual	43	Medical unit	6 m- 1year	>2 years	6m-1 year	3	2	1	4	1	4	4	1	1	2	3	3	3	4	5	5	5	3	4	5	5	5	4
Female	> 20 years	perMaleent contract	57	Medical unit	>2 years	>2 years	1 -2 years	2	1	2	4	1	4	4	2	1	1	3	3	3	4	5	5	5	3	5	4	4	5	4
Female	< 5 years	Eventual	26	Medical unit	>2 years	>2 years	1 -2 years	2	1	2	4	1	3	4	2	1	4	3	3	3	4	4	4	3	4	2	4	1	5	2
Female	> 20 years	perMaleent contract	54	Primary Care Consultation	1 -2 years	>2 years	1 -2 years	1	2	1	4	1	4	1	1	1	3	3	4	4	5	5	3	3	5	4	2	2	5	5
Male	> 20 years	perMaleent contract	53	Medical unit	<6 months	<6 months	6m-1 year	3	2	1	4	1	3	1	2	1	2	3	4	4	3	4	5	5	5	5	5	4	5	1
Female	16-20 years	perMaleent contract	51	Surgical unit	>2 years	6 m- 1year	1 -2 years	1	2	1	4	1	4	1	2	1	2	3	3	3	5	5	5	4	4	5	2	4	5	2
Female	> 20 years	perMaleent contract	54	Pediatrics consultation Primary Care	>2 years	1 -2 years	6m-1 year	1	2	1	4	1	1	1	2	1	2	3	2	3	5	5	5	4	3	5	4	5	5	5
Female	< 5 years	Eventual	26	Medical unit	>2 years	6 m- 1year	1 -2 years	1	1	1	4	1	4	4	1	1	2	1	3	2	2	4	5	3	2	5	3	4	5	5
Female	< 5 years	Eventual	23	Primary Care Consultation	never	>2 years	>2 years	3	2	1	4	1	4	4	2	1	2	1	2	3	4	3	4	5	5	3	4	2	5	3
Female	> 20 years	Eventual	47	Medical unit	>2 years	>2 years	6m-1 year	2	1	2	3	1	4	1	1	2	2	3	2	2	3	5	4	2	3	3	3	3	4	2
Female	> 20 years	perMaleent contract	52	Medical unit	>2 years	>2 years	< 6 months	3	2	2	4	1	1	1	1	2	2	3	2	2	3	3	5	5	4	5	4	4	5	5
Female	> 20 years	perMaleent contract	60	Primary Care Consultation	>2 years	never	1 -2 years	1	2	1	1	1	1	1	2	1	2	3	4	3	5	5	5	5	5	1	5	3	5	5
Female	5-10 years	perMaleent contract	34	Medical unit	>2 years	>2 years	6m-1 year	3	1	1	4	1	4	1	1	1	1	3	4	5	5	5	5	5	5	2	3	4	5	4
Female	5-10 years	Eventual	28	Medical unit	>2 years	1 -2 years	6m-1 year	3	1	1	4	1	1	4	2	1	2	3	2	2	5	5	1	2	2	1	4	1	5	5
Female	16-20 years	perMaleent contract	40	Medical unit	1 -2 years	>2 years	1 -2 years	3	1	3	4	1	3	4	2	1	2	3	3	3	5	5	3	3	3	2	5	3	5	3
Female	< 5 years	Eventual	30	Medical unit	1 -2 years	6 m- 1year	6m-1 year	3	2	1	4	1	2	4	2	1	4	3	4	4	5	5	1	5	5	1	5	1	5	5
Female	16-20 years	Eventual	50	Pediatric hospital service	>2 years	>2 years	6m-1 year	3	2	3	4	1	4	1	2	1	2	3	3	3	4	4	4	4	3	4	4	3	5	4
Female	< 5 years	Eventual	33	Primary Care Consultation	1 -2 years	6 m- 1year	< 6 months	1	2	1	4	1	4	1	1	1	2	2	4	4	5	5	5	5	4	5	5	5	5	5
Female	5-10 years	Eventual	29	Primary Care Consultation	>2 years	>2 years	1 -2 years	3	2	2	4	1	1	1	1	1	2	3	3	3	3	4	5	5	5	3	3	2	5	4
Female	11-15 years	Eventual	37	Medical unit	>2 years	>2 years	1 -2 years	3	1	1	4	1	1	2	1	1	2	2	4	4	4	4	4	3	4	4	4	3	4	5
Female	> 20 years	perMaleent contract	58	Surgical unit	<6 months	6 m- 1year	1 -2 years	3	2	1	4	1	1	4	1	1	3	3	3	3	3	5	5	5	5	1	5	5	5	3
Female	5-10 years	Eventual	32	Medical unit	>2 years	>2 years	1 -2 years	2	1	2	2	1	2	1	2	1	2	1	3	3	3	4	5	5	4	3	5	3	5	5
Female	> 20 years	perMaleent contract	51	Surgical unit	1 -2 years	>2 years	6m-1 year	3	1	2	4	1	1	4	1	4	2	3	2	3	3	5	5	3	2	2	3	3	5	5
Male	5-10 years	perMaleent contract	42	Medical unit	>2 years	<6 months	>2 years	3	1	1	4	1	2	4	1	1	1	3	4	4	5	5	5	5	5	2	5	5	5	5
Female	5-10 years	Eventual	38	Surgical unit	1 -2 years	>2 years	1 -2 years	3	2	1	4	1	1	2	1	1	2	3	3	3	5	5	5	5	5	5	4	5	5	5
Female	> 20 years	perMaleent contract	45	Surgical unit	>2 years	>2 years	6m-1 year	3	2	1	4	1	1	2	1	1	2	3	3	4	5	3	5	5	5	4	5	5	5	5
Female	5-10 years	perMaleent contract	33	Medical unit	>2 years	>2 years	1 -2 years	3	2	1	4	1	2	4	1	1	1	3	3	3	4	4	4	4	3	4	2	3	5	5
Female	> 20 years	perMaleent contract	54	Primary Care Consultation	>2 years	never	6m-1 year	3	2	2	3	1	2	1	3	1	1	3	3	3	5	5	4	5	5	5	5	3	2	3
Female	< 5 years	Eventual	24	Medical unit	6 m- 1year	<6 months	1 -2 years	3	2	3	4	1	2	4	1	1	1	3	5	4	5	5	3	5	5	5	1	3	5	5
Female	5-10 years	Eventual	39	Primary Care Consultation	6 m- 1year	never	6m-1 year	3	1	1	4	1	2	2	1	1	1	3	3	3	3	4	4	3	5	4	1	5	5	5
Female	> 20 years	perMaleent contract	42	Medical unit	1 -2 years	>2 years	1 -2 years	3	1	1	4	1	4	1	1	1	2	3	3	3	5	5	5	5	5	4	5	5	5	4
Male	< 5 years	Eventual	25	Medical unit	>2 years	never	>2 years	1	2	4	4	2	3	4	2	1	2	3	2	2	5	5	5	4	3	5	3	3	3	5
Female	> 20 years	perMaleent contract	45	Primary Care Consultation	never	>2 years	6m-1 year	3	2	1	4	2	4	4	2	1	2	2	1	1	5	5	5	4	4	4	1	5	5	5
Female	11-15 years	Eventual	33	Medical unit	>2 years	<6 months	< 6 months	3	2	1	2	1	4	4	1	1	2	3	4	4	5	5	1	1	5	5	1	5	5	5
Female	11-15 years	perMaleent contract	40	Surgical unit	6 m- 1year	6 m- 1year	1 -2 years	2	1	1	4	1	4	4	2	1	3	3	3	4	4	5	5	5	5	2	5	5	5	5
Male	< 5 years	Eventual	25	Primary Care Consultation	never	never	< 6 months	3	1	1	4	1	1	4	1	1	2	3	3	3	5	4	4	4	3	1	1	1	2	4
Female	> 20 years	perMaleent contract	50	Medical unit	1 -2 years	>2 years	6m-1 year	3	2	1	3	1	1	4	1	1	1	3	3	3	3	4	5	5	5	3	5	2	5	5
Female	5-10 years	perMaleent contract	47	Primary Care Consultation	>2 years	never	6m-1 year	3	1	1	4	1	2	1	2	1	4	3	3	3	3	5	5	5	3	5	5	4	5	5
Female	11-15 years	Eventual	33	Primary Care Consultation	>2 years	>2 years	6m-1 year	3	1	3	2	1	4	4	2	3	2	3	2	3	3	5	5	5	4	4	3	4	5	5
Female	11-15 years	Eventual	38	Surgical unit	6 m- 1year	>2 years	1 -2 years	3	2	1	4	1	2	4	1	1	2	3	4	4	4	4	5	4	5	2	3	4	5	5
Female	11-15 years	perMaleent contract	38	Medical unit	1 -2 years	>2 years	6m-1 year	1	2	1	4	1	4	4	1	1	1	3	4	4	4	4	4	4	4	4	3	4	4	4
Female	> 20 years	perMaleent contract	60	Medical unit	>2 years	>2 years	1 -2 years	2	3	4	2	1	4	1	2	1	2	3	3	3	5	5	5	4	5	2	3	2	5	4
Female	5-10 years	Eventual	27	Medical unit	never	never	6m-1 year	3	1	1	4	1	3	4	2	2	1	3	3	4	3	5	5	4	4	4	5	5	5	5
Female	11-15 years	perMaleent contract	36	Pediatric hospital service	>2 years	never	< 6 months	3	2	1	3	1	4	2	2	1	2	3	2	1	5	5	5	2	4	5	5	5	5	5
Female	> 20 years	perMaleent contract	45	Primary Care Consultation	>2 years	>2 years	6m-1 year	3	2	1	4	1	4	4	2	1	2	3	3	3	1	5	2	3	1	4	2	5	5	5
Female	> 20 years	perMaleent contract	55	Surgical unit	6 m- 1year	never	6m-1 year	1	2	2	4	1	1	1	1	1	1	3	2	2	3	5	5	5	4	2	3	3	5	5
Male	16-20 years	Eventual	42	Surgical unit	>2 years	6 m- 1year	< 6 months	3	1	1	4	3	3	4	2	1	1	2	4	4	5	5	5	5	3	4	4	4	5	5
Female	< 5 years	Eventual	27	Medical unit	>2 years	never	6m-1 year	3	2	2	4	1	2	1	2	2	2	1	2	2	3	5	5	5	5	2	4	2	5	5
Female	> 20 years	Eventual	55	Pediatrics consultation Primary Care	>2 years	>2 years	6m-1 year	3	2	2	1	1	1	1	4	1	2	3	3	3	5	5	5	5	2	3	3	3	4	4
Female	16-20 years	Eventual	48	Pediatrics consultation Primary Care	1 -2 years	never	6m-1 year	3	1	1	4	1	4	1	1	1	1	3	3	4	5	5	5	5	5	3	2	5	5	5
Female	11-15 years	Eventual	36	Medical unit	>2 years	<6 months	< 6 months	3	1	1	4	1	2	4	2	1	1	3	4	4	3	3	3	3	4	2	2	2	3	3
Female	> 20 years	perMaleent contract	48	Surgical unit	1 -2 years	>2 years	1 -2 years	3	1	1	4	1	4	4	2	1	2	3	3	3	2	5	4	4	4	4	4	4	4	4
Female	11-15 years	perMaleent contract	36	Surgical unit	1 -2 years	never	6m-1 year	3	1	1	4	1	1	2	1	1	2	3	4	4	5	5	5	5	5	2	5	3	5	4
Female	< 5 years	Eventual	22	Pediatrics consultation Primary Care	6 m- 1year	never	1 -2 years	2	1	1	1	1	4	4	1	1	2	3	3	3	3	3	3	3	3	3	3	3	5	2
Female	> 20 years	perMaleent contract	57	Primary Care Consultation	1 -2 years	never	1 -2 years	3	1	1	4	3	4	4	2	1	1	2	4	4	5	5	5	5	5	5	5	4	4	4
Female	16-20 years	Eventual	38	Medical unit	<6 months	<6 months	6m-1 year	3	1	1	4	1	2	1	3	1	1	3	5	5	5	5	5	5	5	5	5	5	5	5
Female	11-15 years	Eventual	42	Surgical unit	<6 months	<6 months	1 -2 years	3	1	1	4	1	1	4	2	1	2	3	3	4	4	5	5	5	5	5	5	4	5	3
Female	11-15 years	perMaleent contract	36	Surgical unit	>2 years	>2 years	1 -2 years	3	2	1	4	1	2	4	1	1	1	3	2	3	5	5	5	5	2	5	5	5	5	5
Female	16-20 years	perMaleent contract	44	Medical unit	1 -2 years	6 m- 1year	< 6 months	2	1	3	4	1	3	4	2	1	1	3	3	3	4	5	5	4	5	2	4	4	5	5
Female	> 20 years	perMaleent contract	61	Primary Care Consultation	>2 years	>2 years	1 -2 years	3	2	1	4	1	1	1	2	1	2	3	3	3	5	5	5	5	5	4	2	3	4	4
